# Journal of Experimental Biology

The online version of Journal of Experimental Biology is considered to be the version of record

## Editor-in-Chief

Hans H. Hoppeler (University of Bern, Switzerland)

## Deputy Editor-in-Chief

Andrew A. Biewener (Harvard University, USA)

## Monitoring Editors

Michael H. Dickinson (California Institute of Technology, USA)

Julian A. T. Dow (University of Glasgow, UK)

Craig E. Franklin (University of Queensland, Australia)

Almut Kelber (Lund University, Sweden)

Ken Lukowiak (University of Calgary, Canada)

Sheila N. Patek (Duke University, USA)

Steve F. Perry (University of Ottawa, Canada)

Raul K. Suarez (University of California Santa Barbara, USA)

## Managing Editor

Michaela J. P. Handel

## News and Views Editor

Kathryn Knight

## Reviews Editor

Charlotte E. Rutledge

## Production Editors

Jodie Houghton

Emma N. Kelly

Kate L. Vaughan

## Editorial Administrators

Lisa Carvalho

Sue E. Chamberlain

## Editorial Office

Journal of Experimental Biology

The Company of Biologists Limited

Bidder Building

Station Road

Histon

Cambridge CB24 9LF, UK

Tel: +44 1223 632871

Fax: +44 1223 632873

jeb@biologists.com

## Editorial Advisory Board

Stephen C. Adolph (Harvey Mudd College, USA)

Philip E. Bickler (University of California San Francisco, USA)

Verner P. Bingman (Bowling Green State University, USA)

Simon Blomberg (University of Queensland, Australia)

Elizabeth L. Brainerd (Brown University, USA)

Geoffrey M. Coast (Birkbeck, University of London, UK)

Thomas S. Collett (University of Sussex, UK)

Stacey Combes (University of California Davis, USA)

Andrew R. Cossins (University of Liverpool, UK)

Monica Daley (The Royal Veterinary College, UK)

Mark W. Denny (Stanford University, USA)

Heather Eisthen (Michigan State University, USA)

Walter Federle (University of Cambridge, UK)

Cheryl Hayashi (University of California Riverside, USA)

Jan Hemmi (University of Western Australia, Australia)

David Hu (Georgia Institute of Technology, USA)

Sönke Johnsen (Duke University, USA)

Michael F. Land (University of Sussex, UK)

Lynn B. Martin (University of South Florida, USA)

William K. Milsom (University of British Columbia, Canada)

Rajat Mittal (Johns Hopkins University, USA)

Cynthia F. Moss (University of Maryland, USA)

Gabrielle A. Nevitt (University of California Davis, USA)

Göran E. Nilsson (University of Oslo, Norway)

Michael J. O'Donnell (McMaster University, Canada)

Frank Seebacher (University of Sydney, Australia)

Brent J. Sinclair (Western University, Canada)

Kenneth Söderhäll (Uppsala University, Sweden)

George N. Somero (Stanford University, USA)

Eric D. Tytell (Tufts University, USA)

Dehua Wang (Chinese Academy of Sciences, China)

Tobias Wang (University of Aarhus, Denmark)

Z. Jane Wang (Cornell University, USA)

Craig R. White (Monash University, Australia)

Alan M. Wilson (The Royal Veterinary College, UK)

Christopher M. Wood (McMaster University, Canada)

Patricia A. Wright (University of Guelph, Canada)
